# Supplementary material for: Graphene oxide as a nanocarrier for gramicidin (GOGD) for high antibacterial performance
Source: Royal Society of Chemistry journal article supplement (doi:10.1039/c4ra07250b), 2014-01-01

**Fig S1.** MALDI spectrum of gramicidin

**Fig S2 .** Optical images of plate counting protocol for *P. aeruginosa* where (a) 0, (b) 25mg/mL, (c) 50mg/mL, (d) 75mg/mL and (e) 1.0mg/mL.

**Fig S3 .** Optical images of plate counting protocol for *S. aureus* where (a) 0, (b) 25mg/mL, (c) 50mg/mL, (d) 75mg/mL and (e) 1.0mg/mL.

**Fig S4.** Fluorescence respond upon addition different nanomaterials.

**Fig S5.** 3D-Fluorescence emission of tryptophan for (A) *P. aeruginosa* and (B) *S. aureus* after incubation with (a) control, (b) gramicidin, (c) graphene oxide and (d) graphene oxide@gramicidin

**Table 1** The antibacterial activity (minimum inhibitory concentration in  $\mu\text{g mL}^{-1}$ ) of GO, GD, and GOGD

| Bacteria Strain     | Technique                         | GD  | GO  | GOGD |
|---------------------|-----------------------------------|-----|-----|------|
| <i>P.aeruginosa</i> | standard microdilution procedures | ND  | 200 | 2    |
| <i>S.aureus</i>     | standard microdilution procedures | 200 | 40  | 2    |

**Fig. S1**

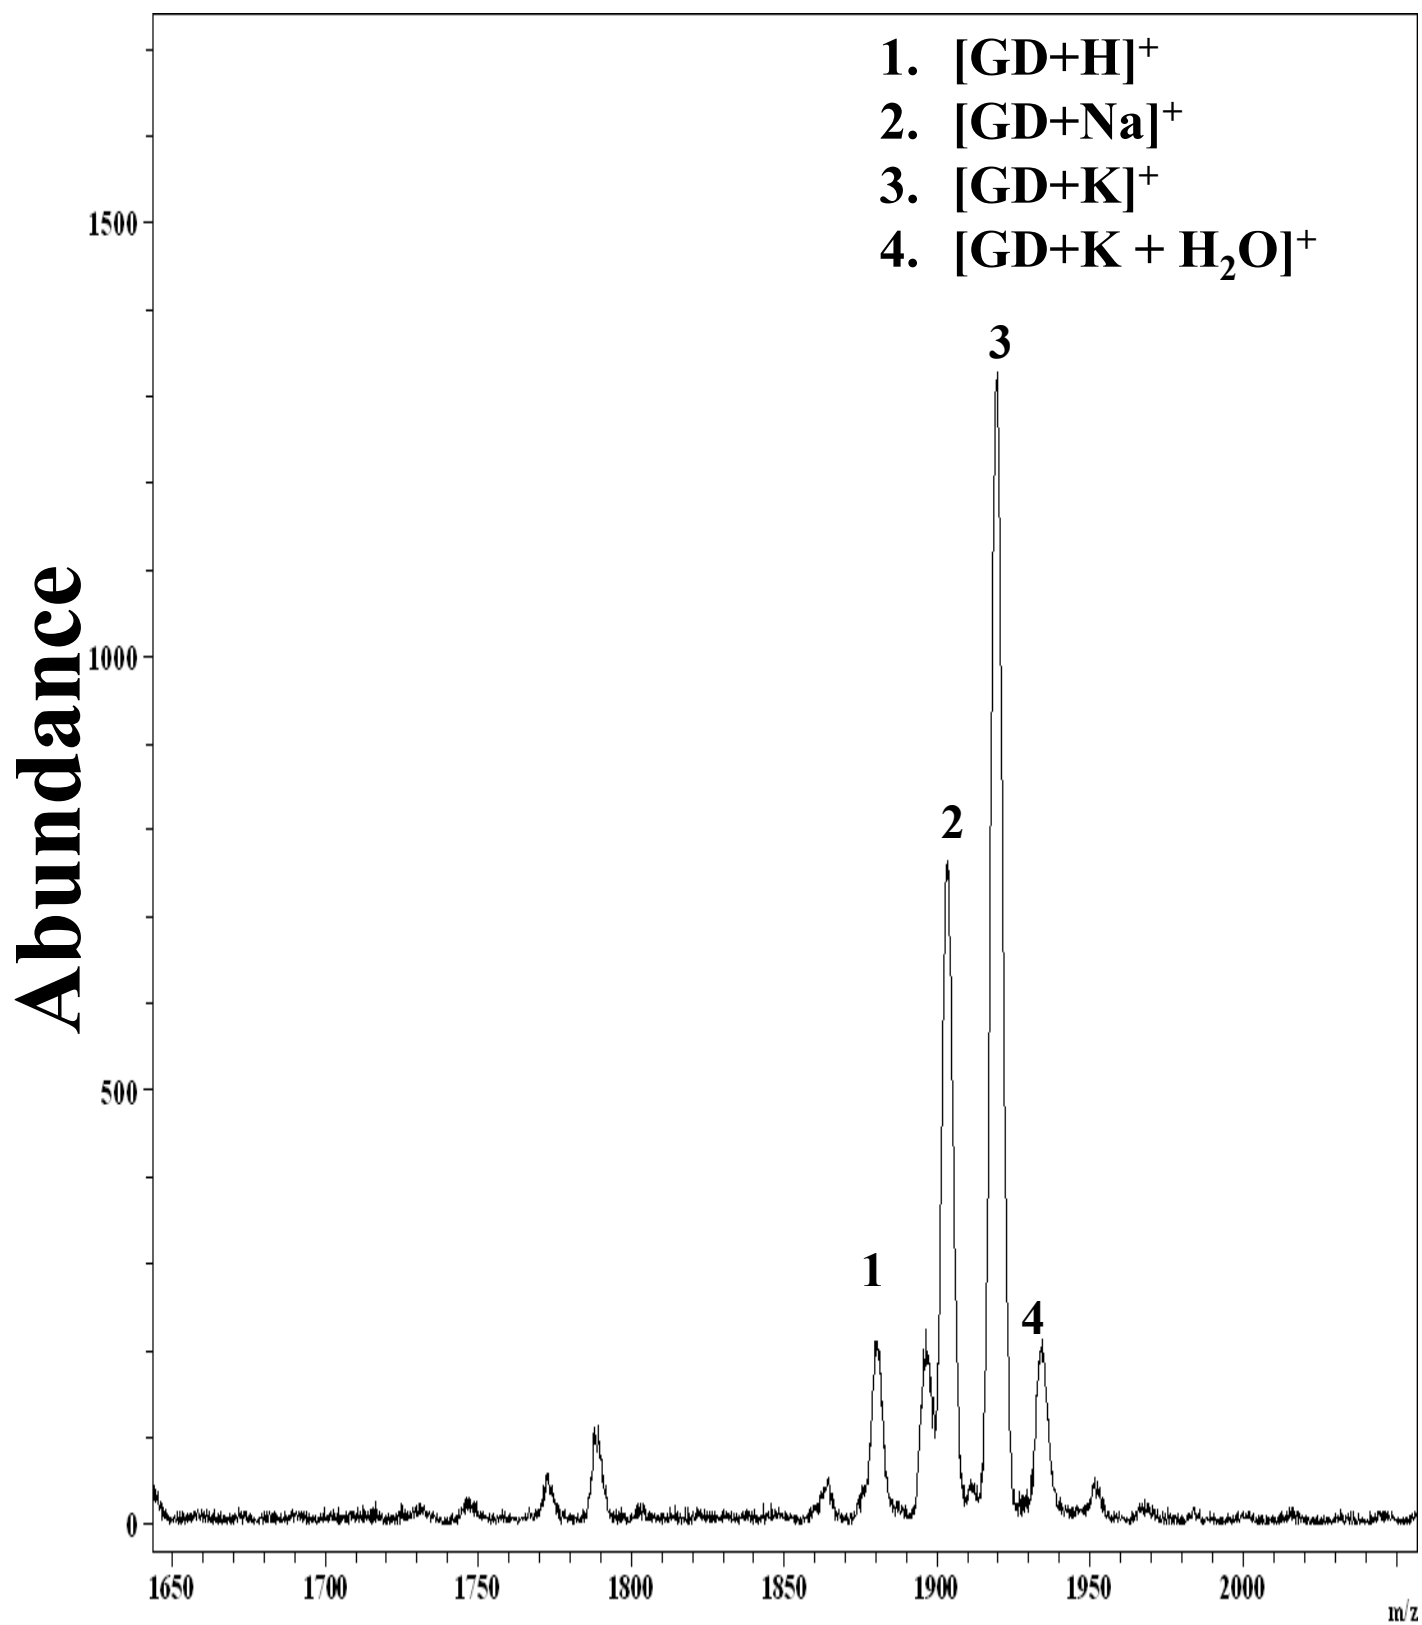

**Fig. S2**

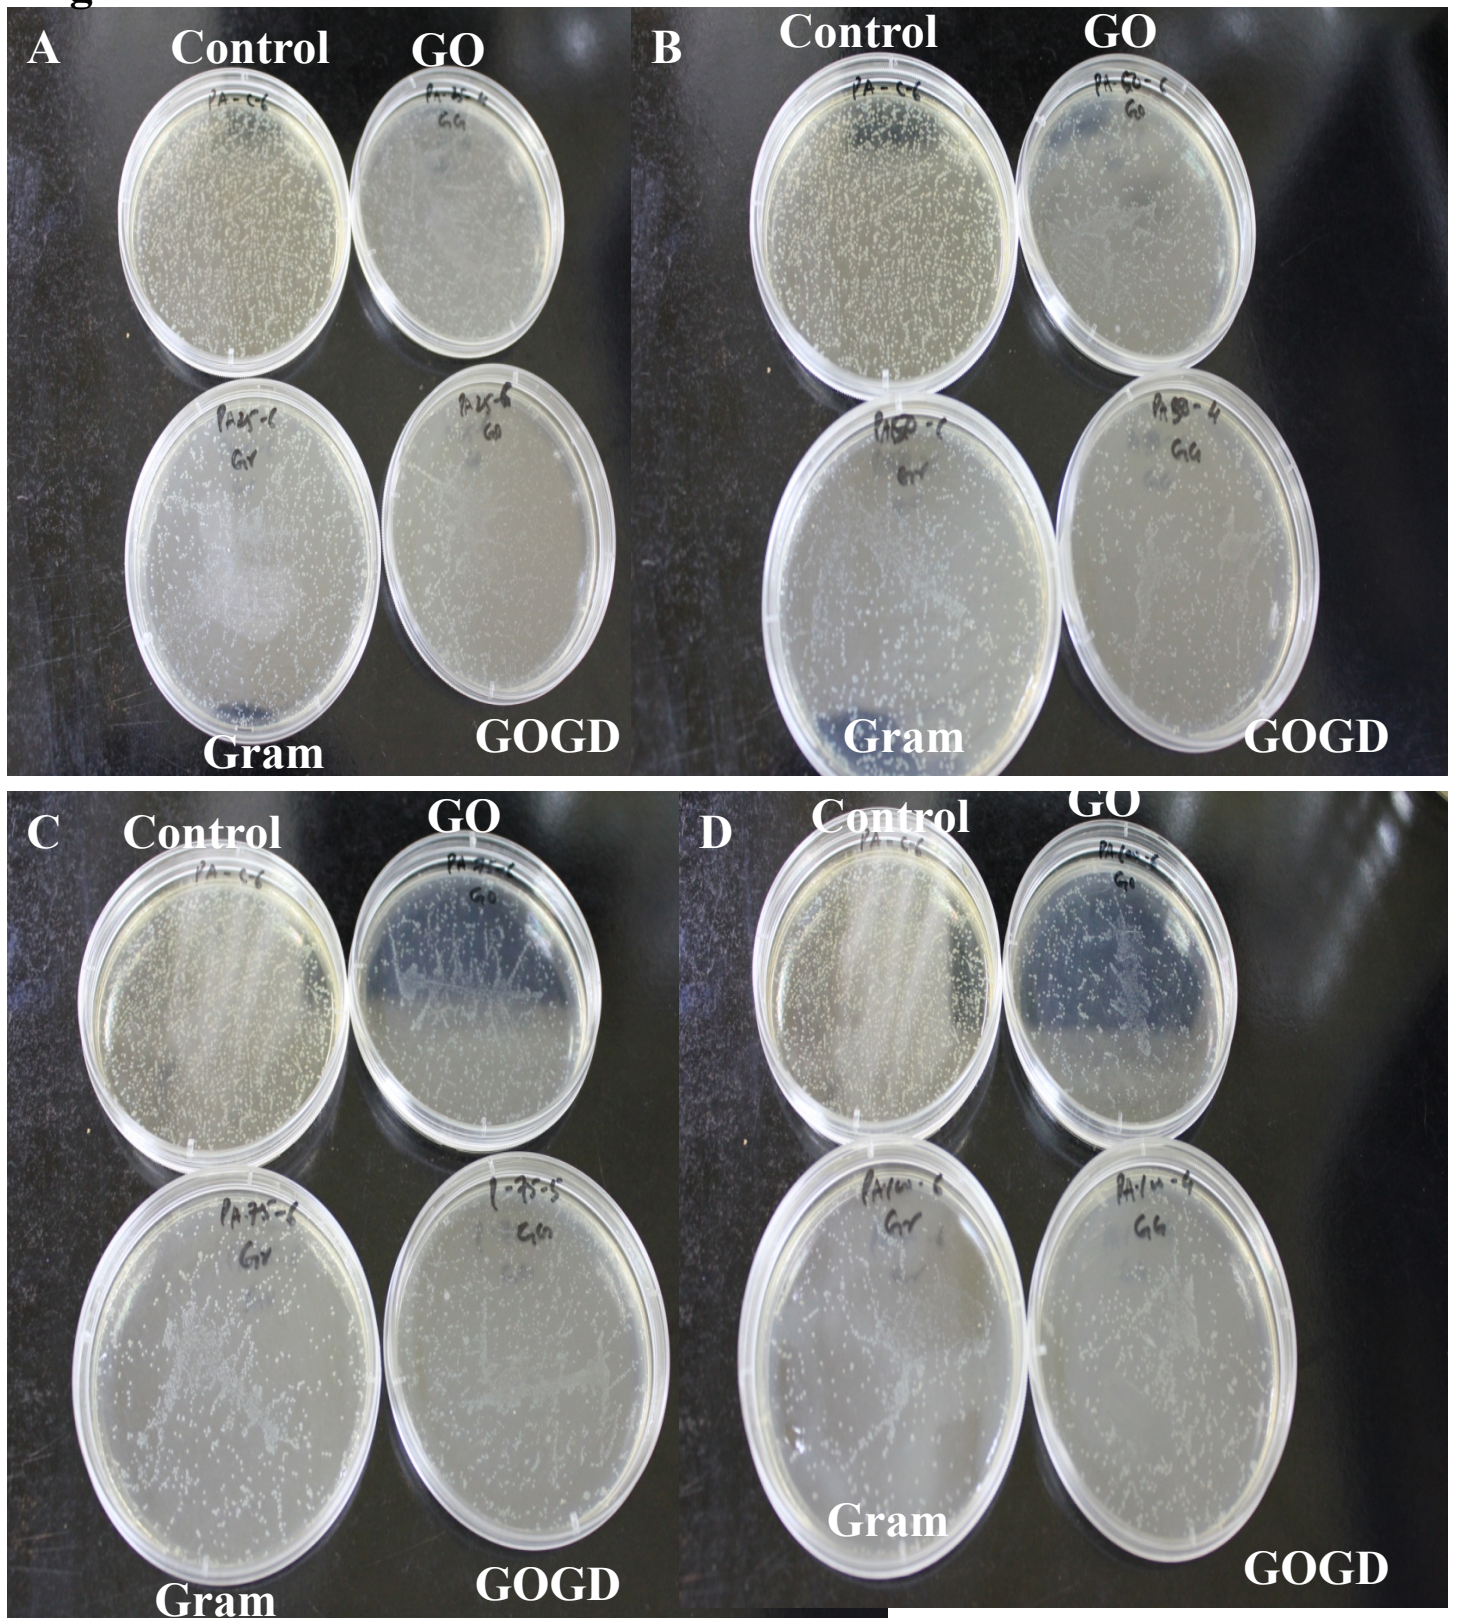



**Fig. S4**

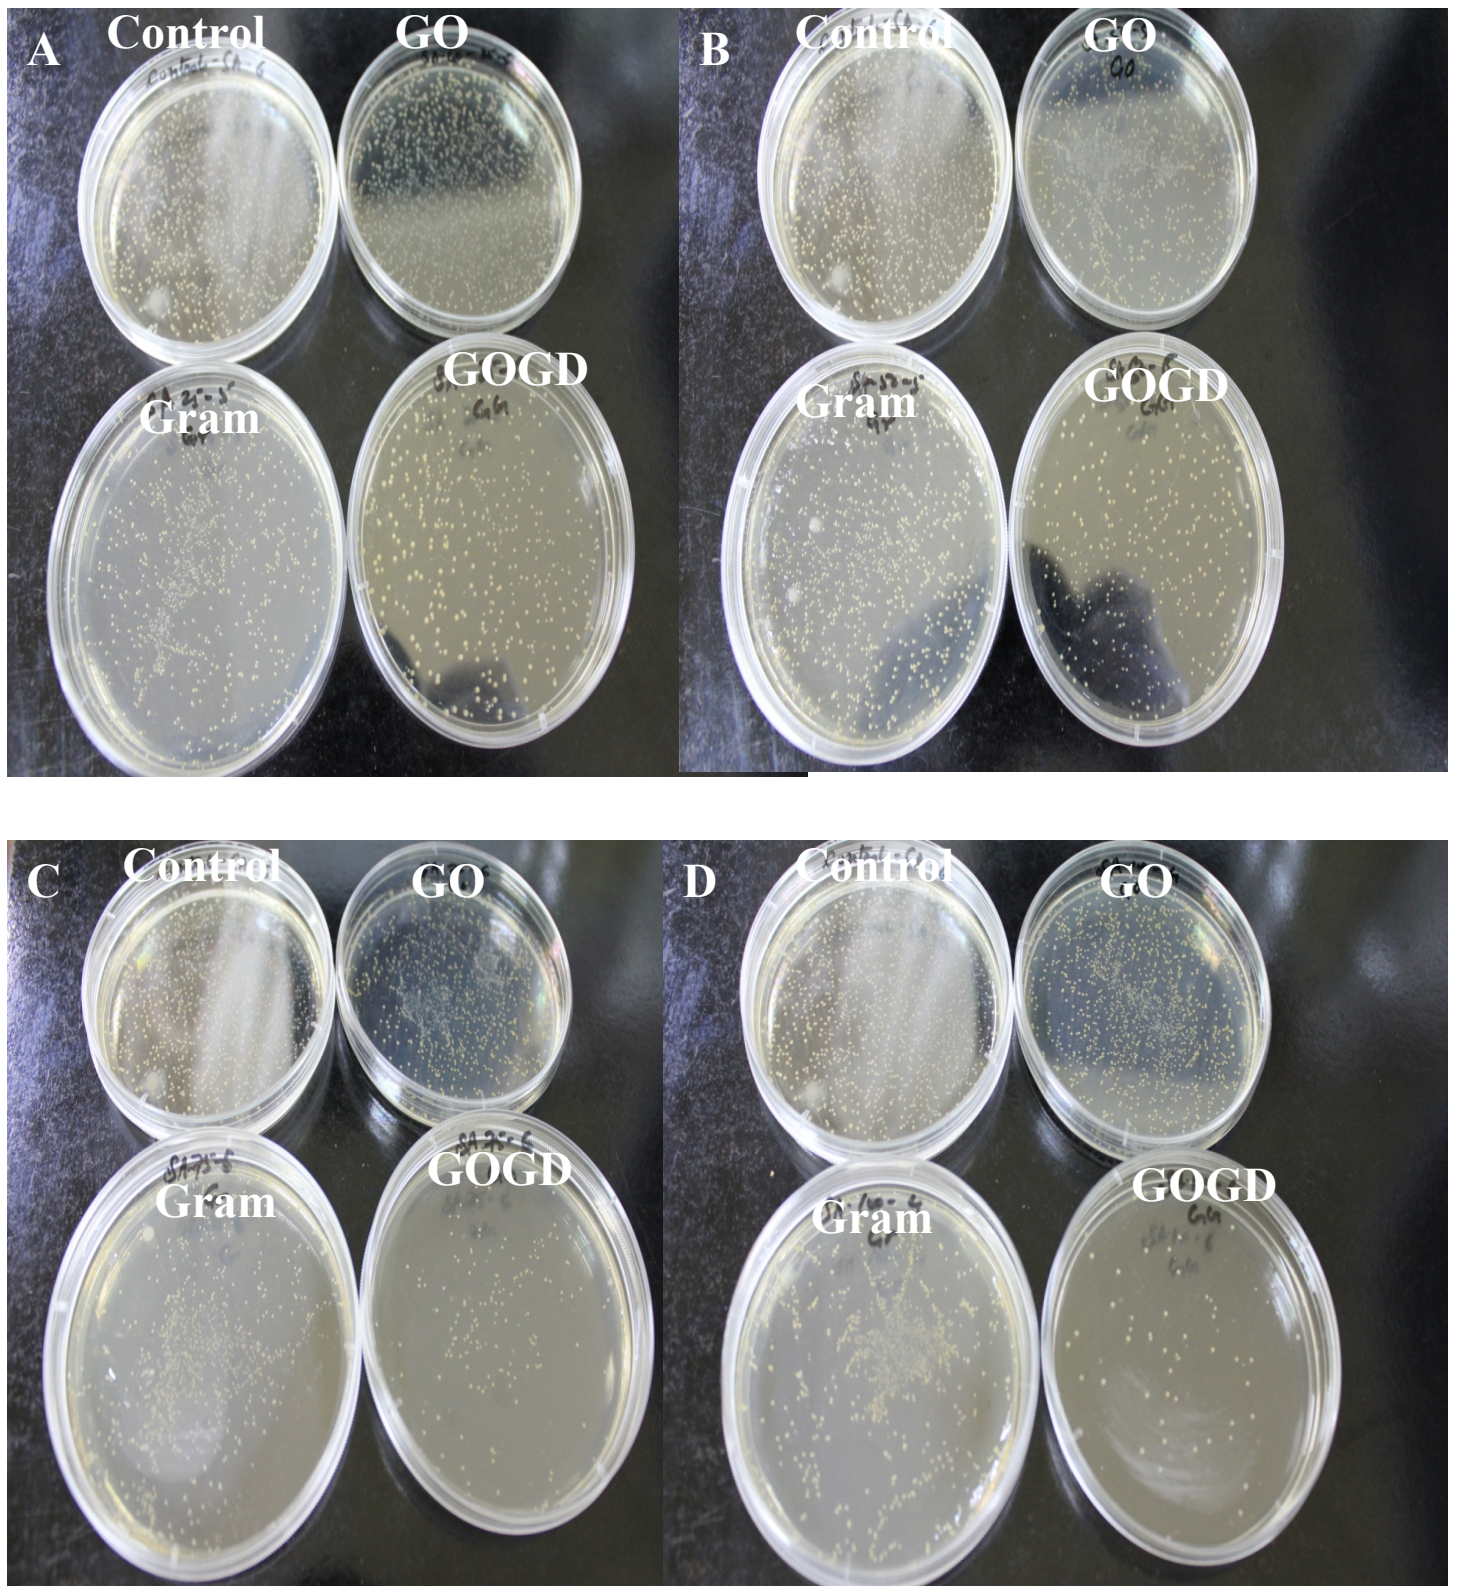

**Fig. S5**

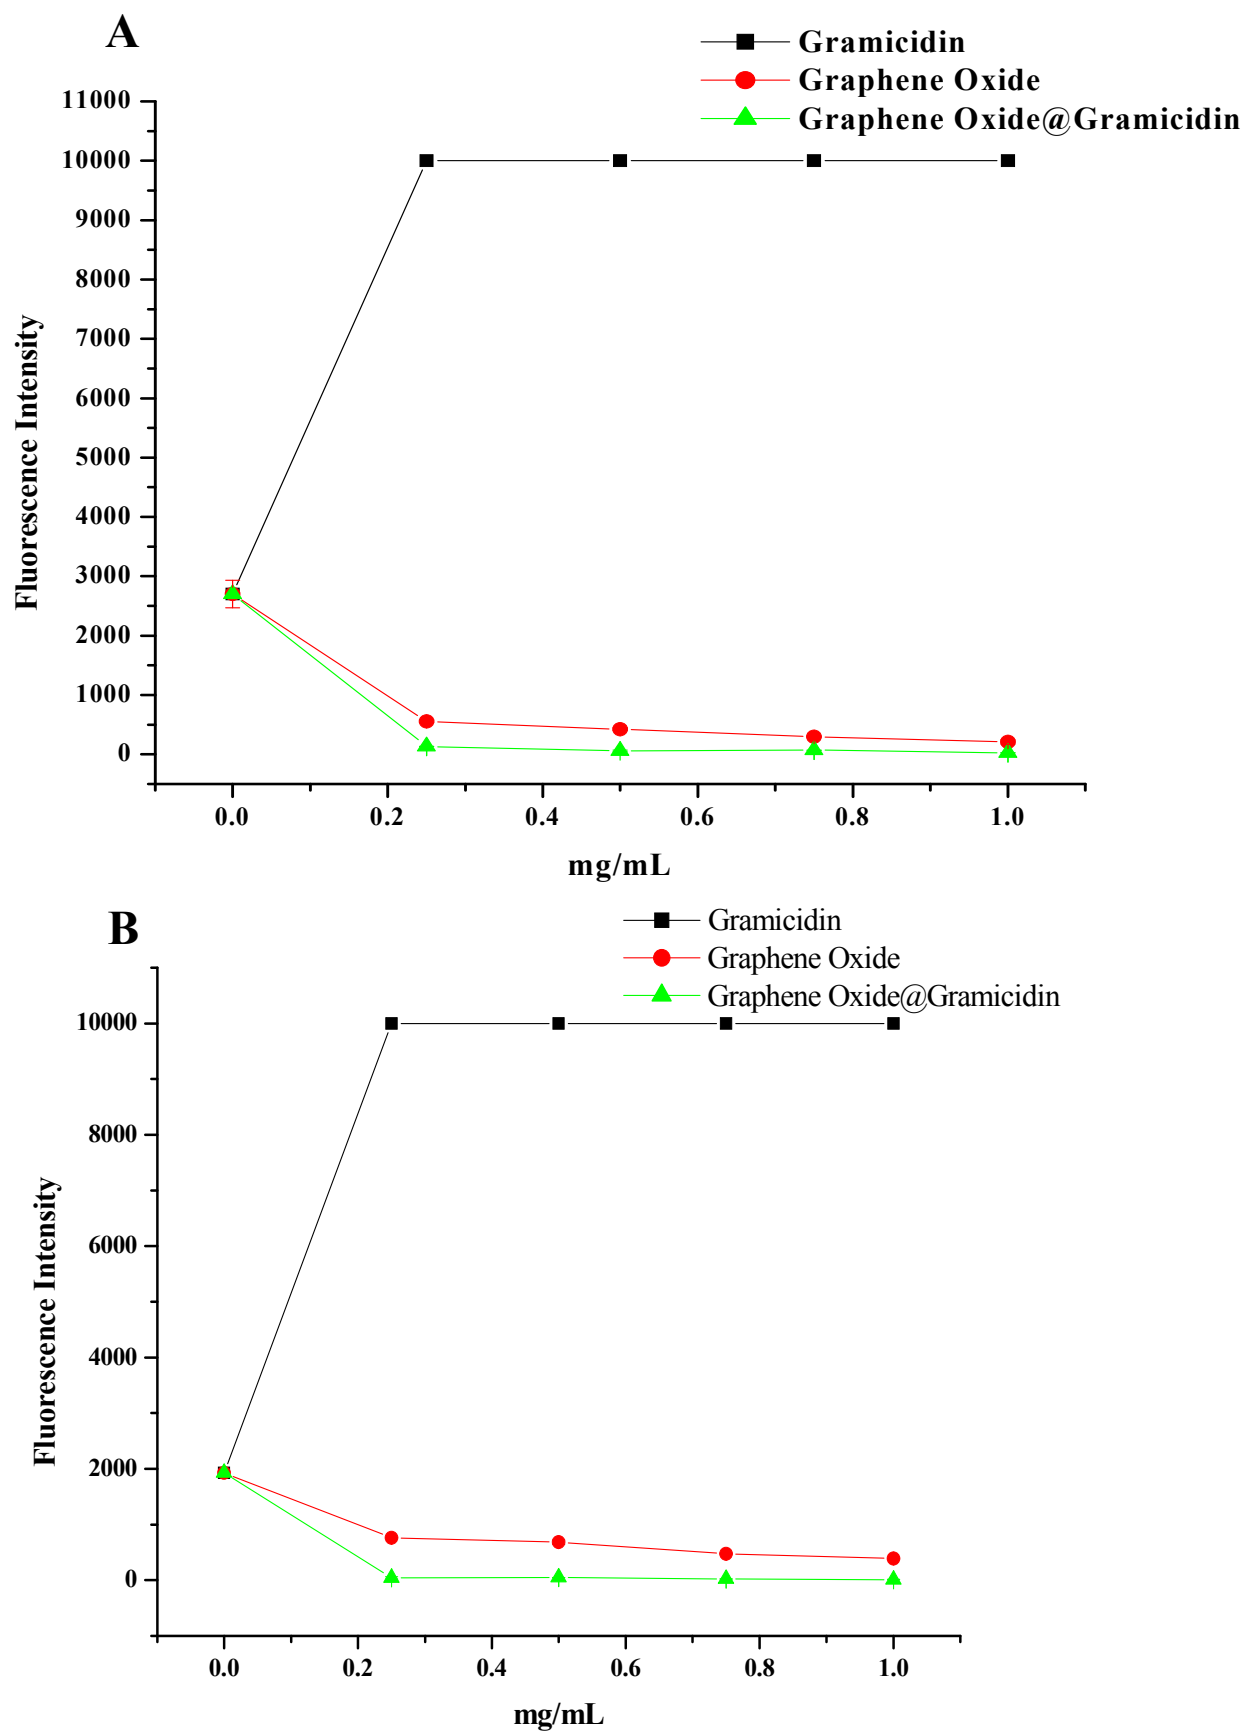



**Fig. S6**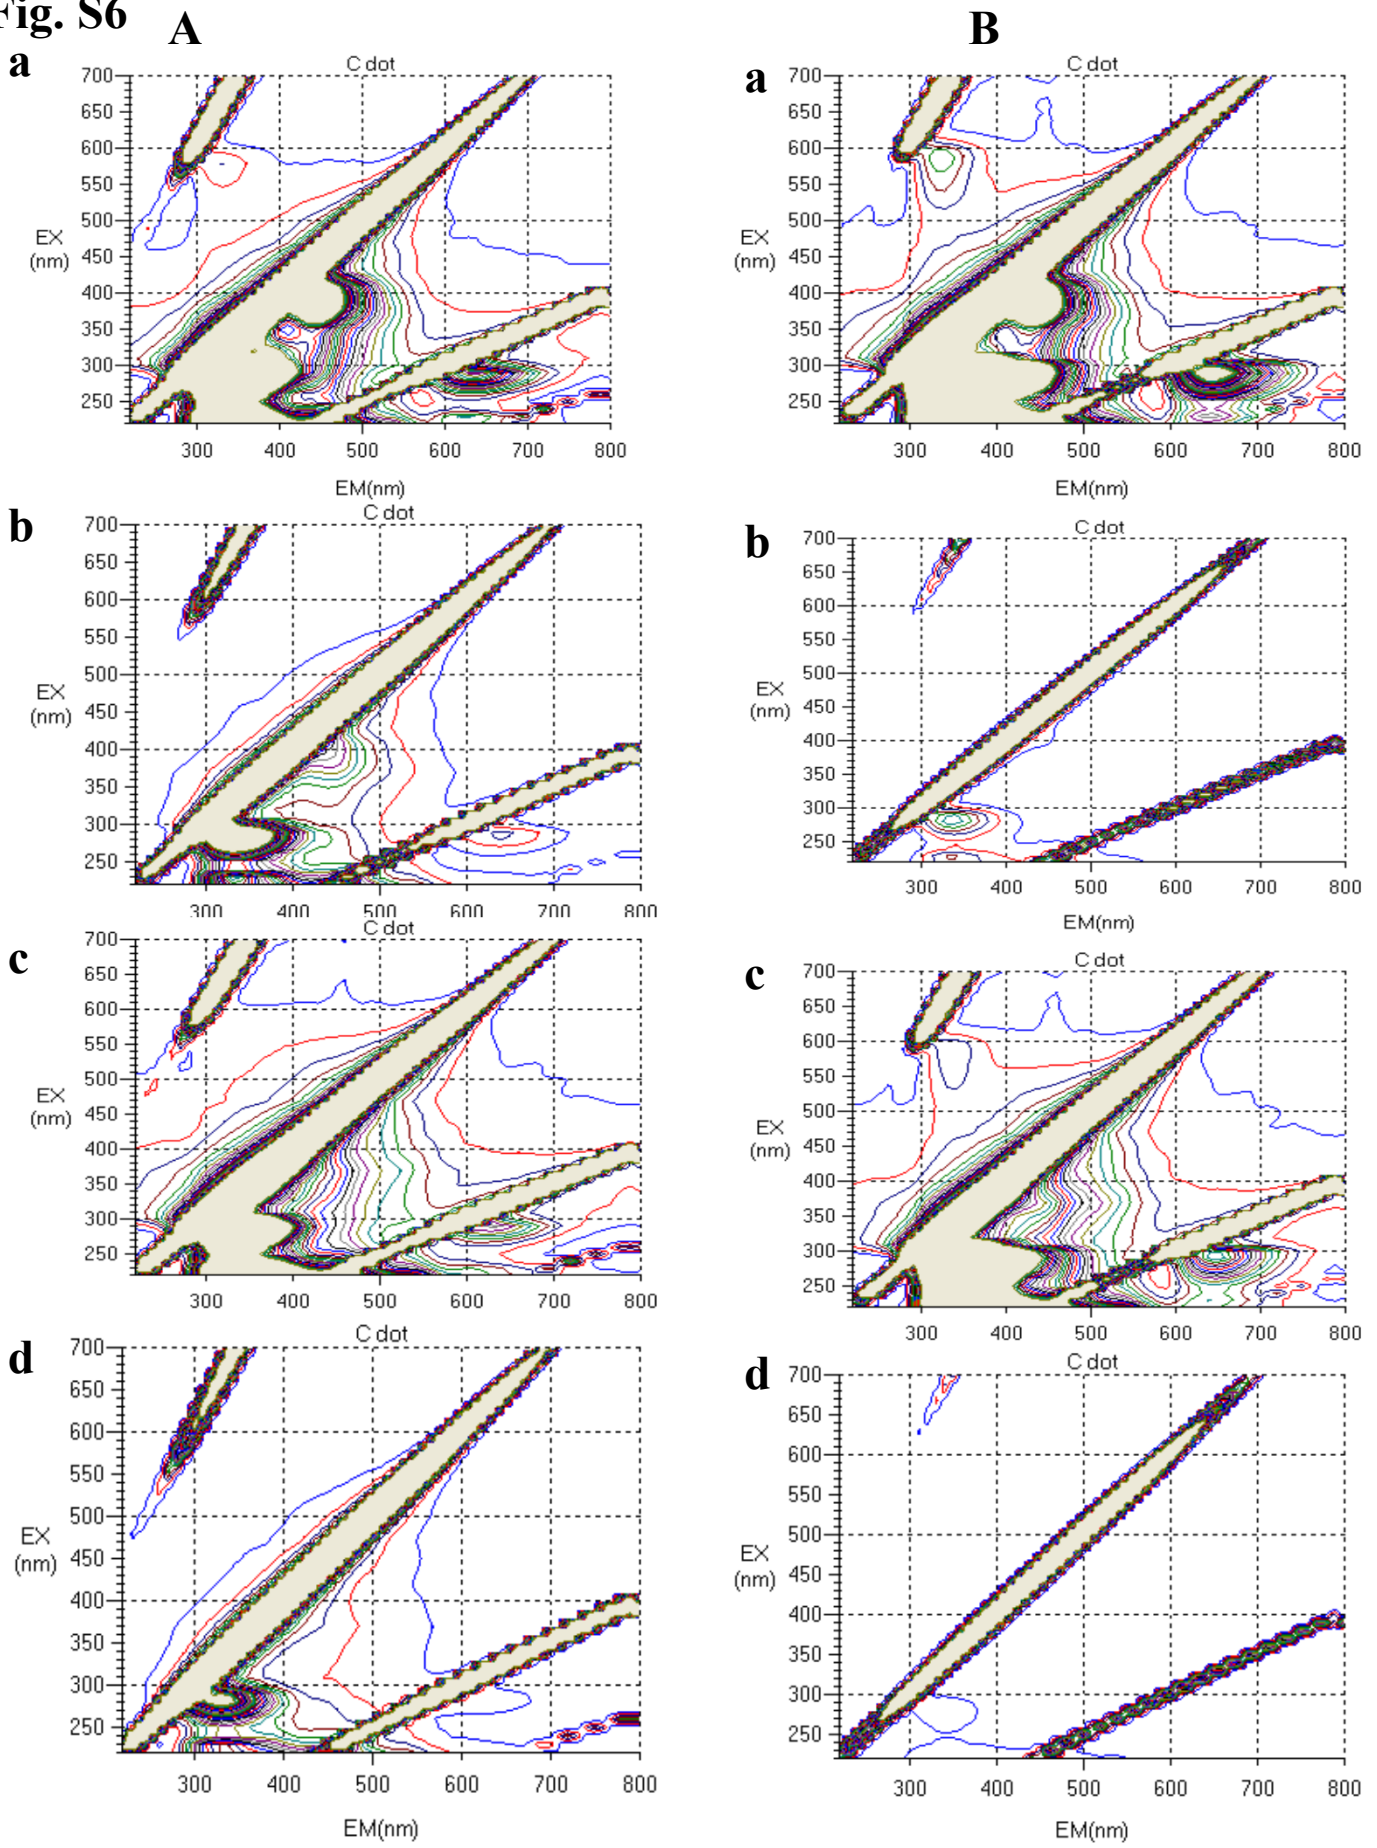

Supplement: c4ra07250b1.pdf [file c4ra07250b1.pdf]
